# Supplementary material for: The C–H bond activation in 1-ethyl-3-methylimidazolium acetate–copper(ii) acetate–water–air (dioxygen) systems
Source: Royal Society of Chemistry journal article supplement (doi:10.1039/c3dt51946e), 2013-09-27
Supplement: c3dt51946e.pdf [file c3dt51946e.pdf]

## Electronic Supplementary Information

### The C-H bond activation in the 1-ethyl-3-methylimidazolium acetate – copper(II) acetate – water – air (dioxygen) systems

Valery G. Shtyrlin,\* Nikita Yu. Serov, Daut R. Islamov, Alexander L. Kon'kin, Mikhail S. Bukharov, Oleg I. Gnezdilov, Dmitry B. Krivolapov, Ol'ga N. Kataeva, Gulnara A. Nazmutdinova and Frank Wendler

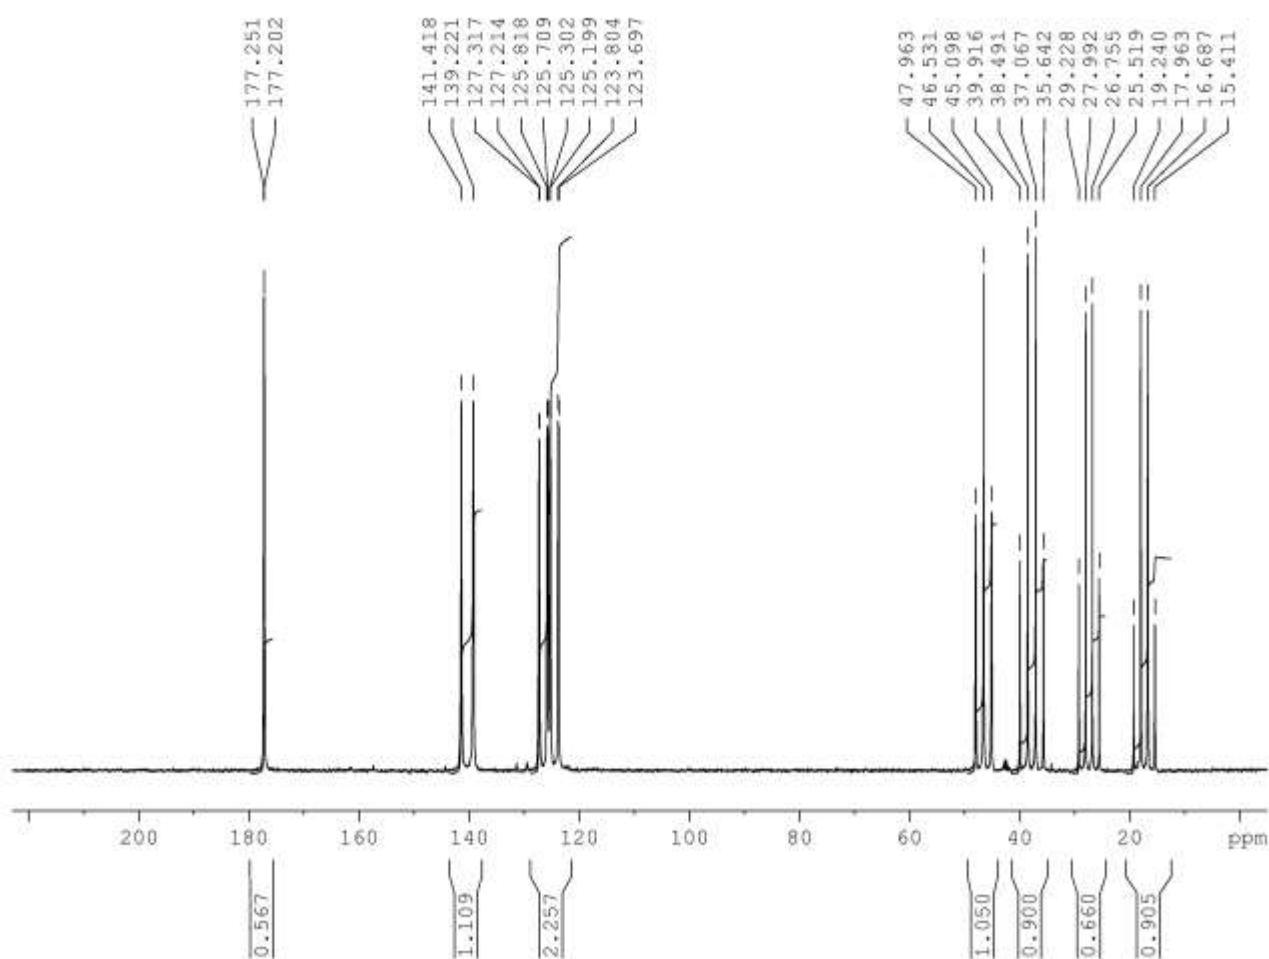

**Figure 1Sa** The  $^{13}\text{C}$  NMR spectrum of pure IL ( $[\text{C}_2\text{C}_1\text{im}][\text{AcO}]$ ) at  $80^\circ\text{C}$ .

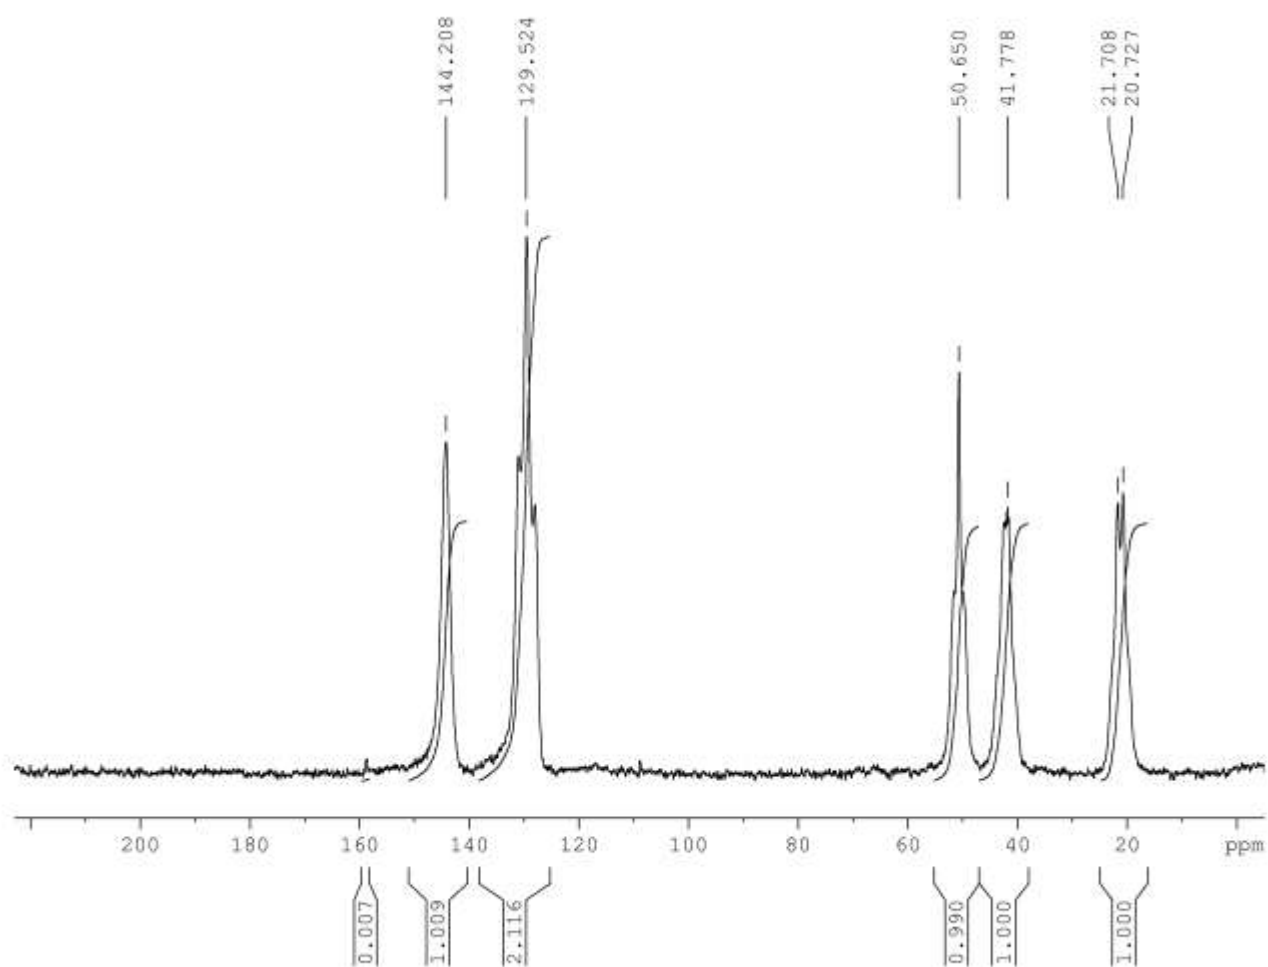

**Figure 1Sb** The  $^{13}\text{C}$  NMR spectrum of the A system after 1 hour heating at 80 °C.

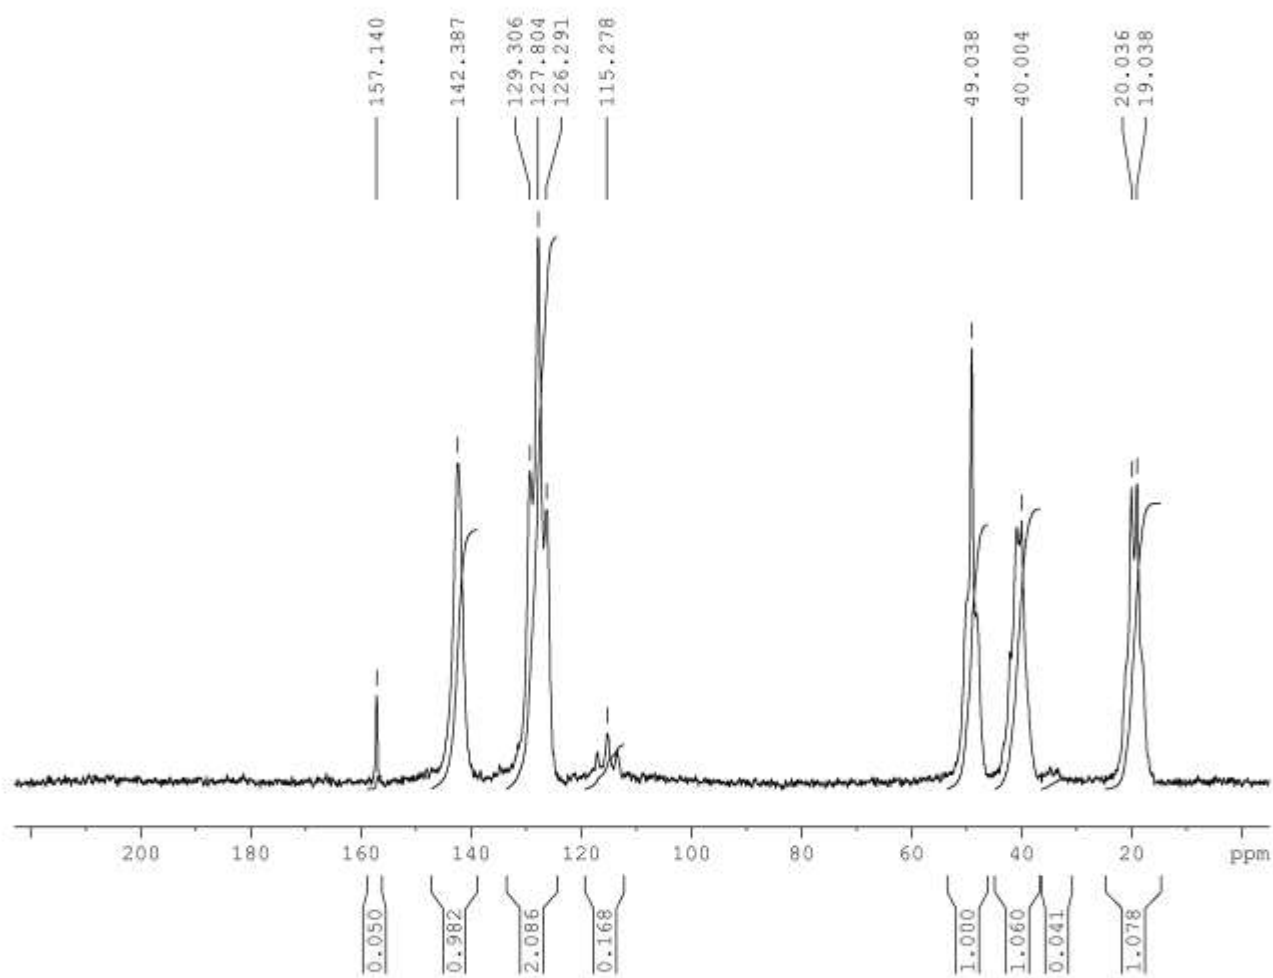

**Figure 1Sc** The  $^{13}\text{C}$  NMR spectrum of the **D** system after 8 hour heating at 80 °C.

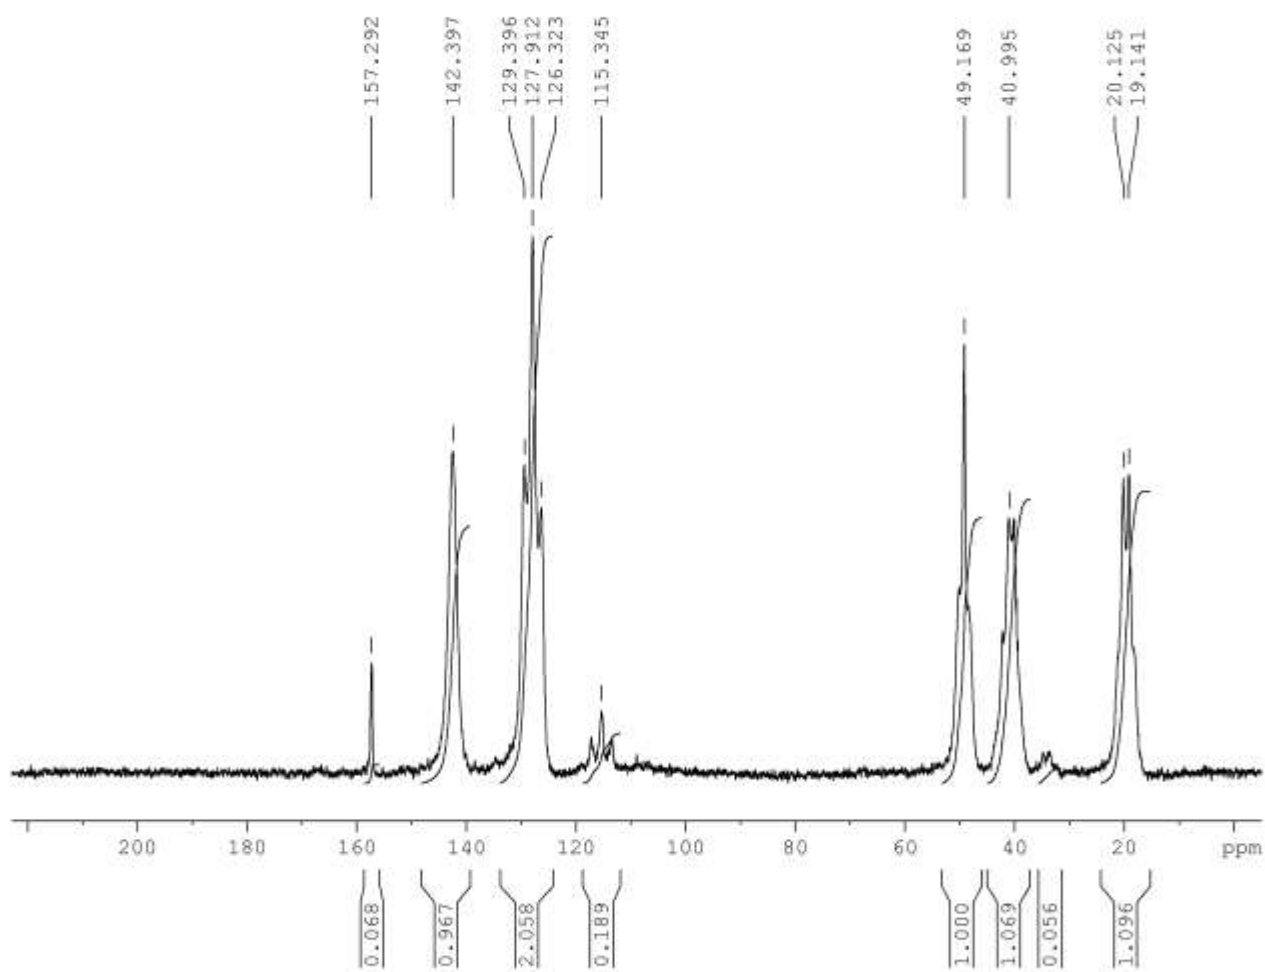

**Figure 1Sd** The  $^{13}\text{C}$  NMR spectrum of the **D** system after 14 hour heating at 80 °C.

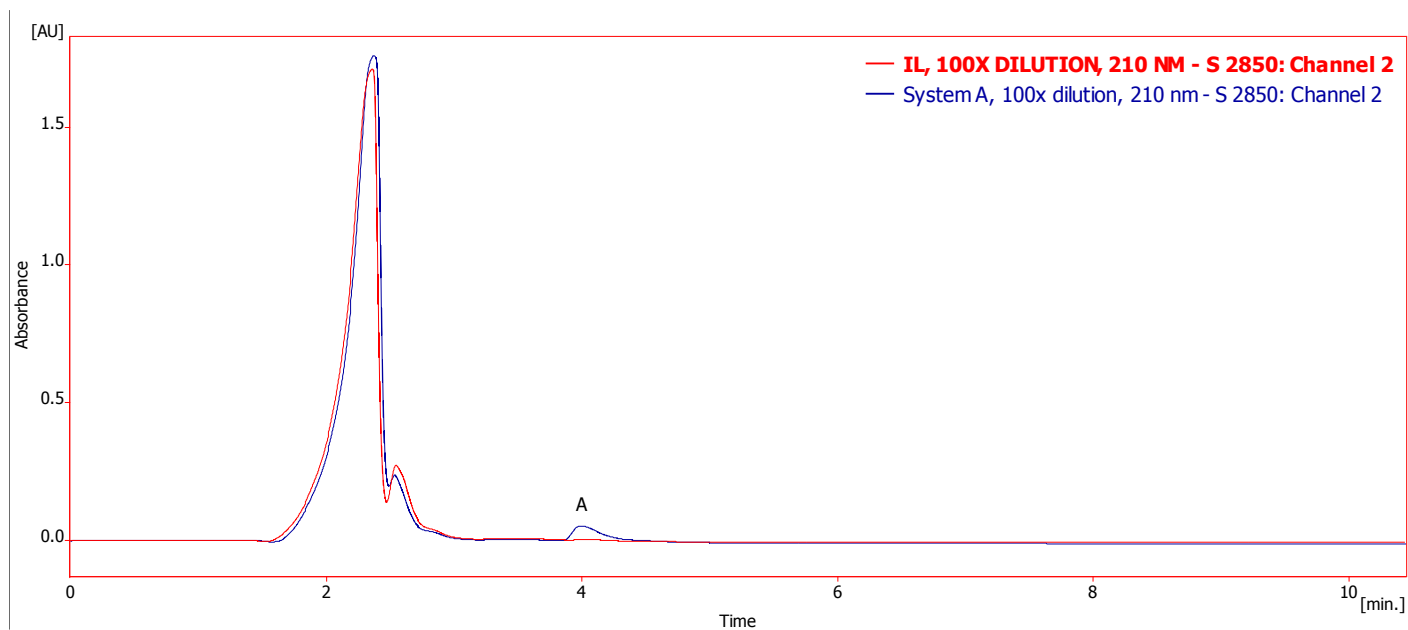

**Figure 2Sa** Chromatograms of the IL (red) and system A (blue). Mobile phase: 30% acetonitrile/70% double distilled water. Column: Waters Spherisorb ODS-2 column (4.6×250 mm, 5 μm particle size) with pre-column (4.6×10 mm). Separation conditions: 35 °C and 1.0 ml/min flow rate. Detection at 210 nm. Injection volume: 5 μl (after 100-fold dilution of the samples with mobile phase). The A signal corresponds to C<sub>1</sub>C<sub>2</sub>imO.

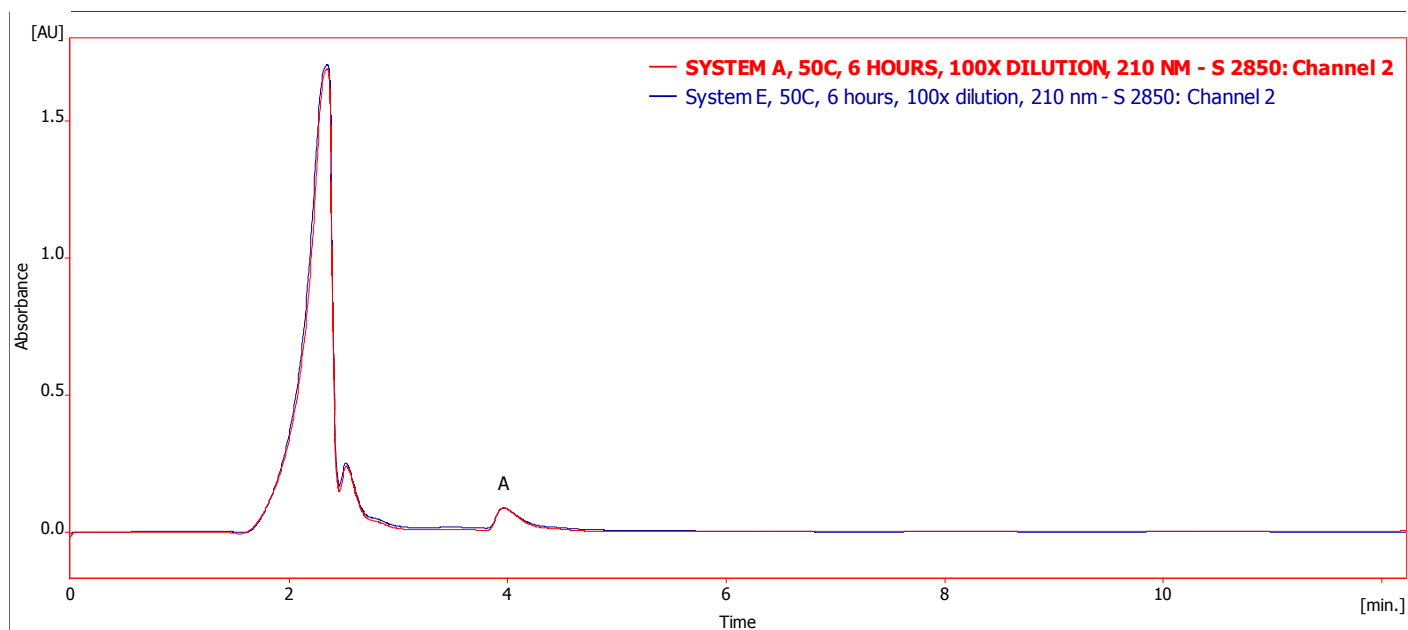

**Figure 2Sb** Chromatograms of the A (red) and E (blue) systems after 6 hour heating at 50 °C. The A signal corresponds to C<sub>1</sub>C<sub>2</sub>imO. The analysis conditions are the same as in the legend to Fig. 2Sa.

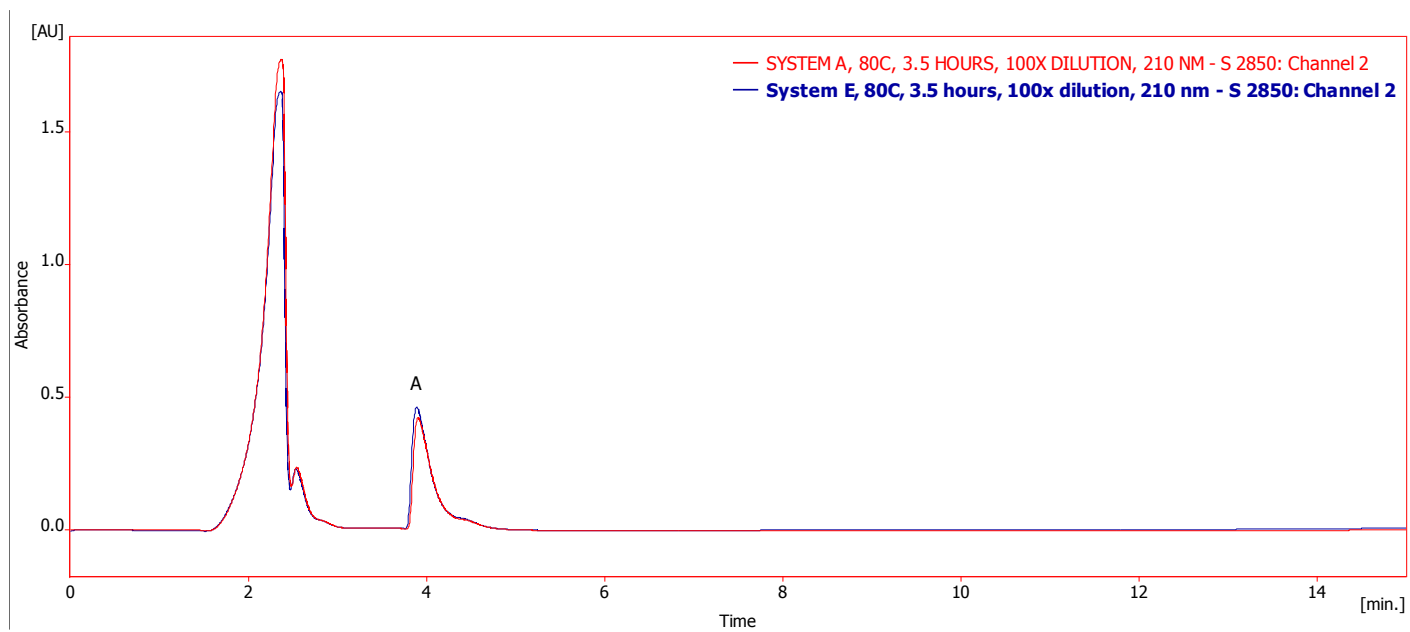

**Figure 2Sc** Chromatograms of the **A** (red) and **E** (blue) systems after 3.5 hour heating at 75 °C. The **A** signal corresponds to  $C_1C_2imO$ . The analysis conditions are the same as in the legend to Fig. 2Sa.

**Table 1S** Selected interatomic distances with standard deviations in parentheses for the **1** crystal

| Bond     | <i>d</i> , Å | Bond     | <i>d</i> , Å |
|----------|--------------|----------|--------------|
| Cu1-O7   | 1.931(6)     | C18-H18A | 0.9900       |
| Cu1-O1   | 1.961(6)     | C18-H18B | 0.9900       |
| Cu1-O3   | 1.964(6)     | C20-H20A | 0.9800       |
| Cu1-O5   | 1.976(6)     | C20-H20B | 0.9800       |
| Cu1-O6   | 2.783(6)     | C20-H20C | 0.9800       |
| Cu1-O4   | 2.727(6)     | C12-C13  | 1.511(12)    |
| O5-C5    | 1.258(10)    | C12-H12A | 0.9900       |
| O7-C7    | 1.278(11)    | C12-H12B | 0.9900       |
| O1-C1    | 1.276(11)    | C13-H13A | 0.9800       |
| O3-C3    | 1.304(10)    | C13-H13B | 0.9800       |
| O4-C3    | 1.238(10)    | C13-H13C | 0.9800       |
| N1-C9    | 1.328(10)    | C19-H19A | 0.9800       |
| N1-C10   | 1.371(10)    | C19-H19B | 0.9800       |
| N1-C14   | 1.464(10)    | C19-H19C | 0.9800       |
| N3-C15   | 1.346(10)    | C3-C4    | 1.501(11)    |
| N3-C16   | 1.366(10)    | C4-H4A   | 0.9800       |
| N3-C20   | 1.455(11)    | C4-H4B   | 0.9800       |
| N2-C9    | 1.358(10)    | C4-H4C   | 0.9800       |
| N2-C11   | 1.371(10)    | C1-O2    | 1.228(10)    |
| N2-C12   | 1.486(10)    | C1-C2    | 1.523(12)    |
| N4-C15   | 1.329(11)    | C2-H2A   | 0.9800       |
| N4-C17   | 1.357(10)    | C2-H2B   | 0.9800       |
| N4-C18   | 1.484(11)    | C2-H2C   | 0.9800       |
| C9-C15   | 1.441(11)    | O6-C5    | 1.266(10)    |
| C17-C16  | 1.324(12)    | C5-C6    | 1.484(13)    |
| C17-H17  | 0.9500       | C6-H6A   | 0.9800       |
| C16-H16  | 0.9500       | C6-H6B   | 0.9800       |
| C10-C11  | 1.353(11)    | C6-H6C   | 0.9800       |
| C10-H10  | 0.9500       | C8-C7    | 1.508(13)    |
| C14-H14A | 0.9800       | C8-H8A   | 0.9800       |
| C14-H14B | 0.9800       | C8-H8B   | 0.9800       |
| C14-H14C | 0.9800       | C8-H8C   | 0.9800       |
| C11-H11  | 0.9500       | O8-C7    | 1.251(11)    |
| C18-C19  | 1.505(14)    |          |              |

**Table 2S** Selected angles with standard deviations in parentheses for the **1** crystal

| Angle     | $\omega, ^\circ$ |
|-----------|------------------|
| O7-Cu1-O1 | 89.2(3)          |
| O7-Cu1-O3 | 91.3(3)          |
| O1-Cu1-O3 | 179.3(3)         |
| O7-Cu1-O5 | 172.8(3)         |
| O1-Cu1-O5 | 87.7(2)          |
| O3-Cu1-O5 | 91.9(2)          |
| C5-O5-Cu1 | 110.6(6)         |
| C7-O7-Cu1 | 129.2(6)         |
| C1-O1-Cu1 | 115.7(6)         |
| C3-O3-Cu1 | 108.3(5)         |



**Table 3S** Selected interatomic distances with standard deviations in parentheses for the **2** crystal

| Bond    | <i>d</i> , Å | Bond   | <i>d</i> , Å |
|---------|--------------|--------|--------------|
| Cu1-O3  | 1.9642(17)   | C1-C2  | 1.511(3)     |
| Cu1-O2  | 1.9664(17)   | C3-O2  | 1.261(3)     |
| Cu1-O1  | 1.9670(18)   | C3-C4  | 1.507(3)     |
| Cu1-O4  | 1.9737(18)   | N2-C5  | 1.370(3)     |
| Cu1-O5  | 2.1469(16)   | N2-C7  | 1.394(3)     |
| Cu1-Cu1 | 2.6366(5)    | N2-C11 | 1.449(3)     |
| O4-C3   | 1.256(3)     | N1-C5  | 1.363(3)     |
| O1-C1   | 1.260(3)     | N1-C6  | 1.393(3)     |
| O2-C3   | 1.261(3)     | N1-C8  | 1.457(3)     |
| O3-C1   | 1.267(3)     | C8-C9  | 1.498(4)     |
| O5-C5   | 1.251(3)     | C6-C7  | 1.334(4)     |
| C1-O3   | 1.267(3)     |        |              |

**Table 4S** Selected angles with standard deviations in parentheses for the **2** crystal

| Angle      | $\omega, ^\circ$ |
|------------|------------------|
| O3-Cu1-O2  | 89.27(8)         |
| O3-Cu1-O1  | 168.30(7)        |
| O2-Cu1-O1  | 88.58(8)         |
| O3-Cu1-O4  | 88.52(7)         |
| O2-Cu1-O4  | 168.27(7)        |
| O1-Cu1-O4  | 91.26(8)         |
| O3-Cu1-O5  | 98.59(7)         |
| O2-Cu1-O5  | 98.18(7)         |
| O1-Cu1-O5  | 93.10(7)         |
| O4-Cu1-O5  | 93.55(7)         |
| O3-Cu1-Cu1 | 86.26(5)         |
| O2-Cu1-Cu1 | 86.23(5)         |
| O1-Cu1-Cu1 | 82.13(5)         |
| O4-Cu1-Cu1 | 82.13(5)         |
| O5-Cu1-Cu1 | 173.45(5)        |
| C3-O4-Cu1  | 125.36(16)       |
| C1-O1-Cu1  | 125.86(15)       |
| C3-O2-Cu1  | 120.79(15)       |
| C1-O3-Cu1  | 120.95(15)       |
| C5-O5-Cu1  | 126.44(16)       |

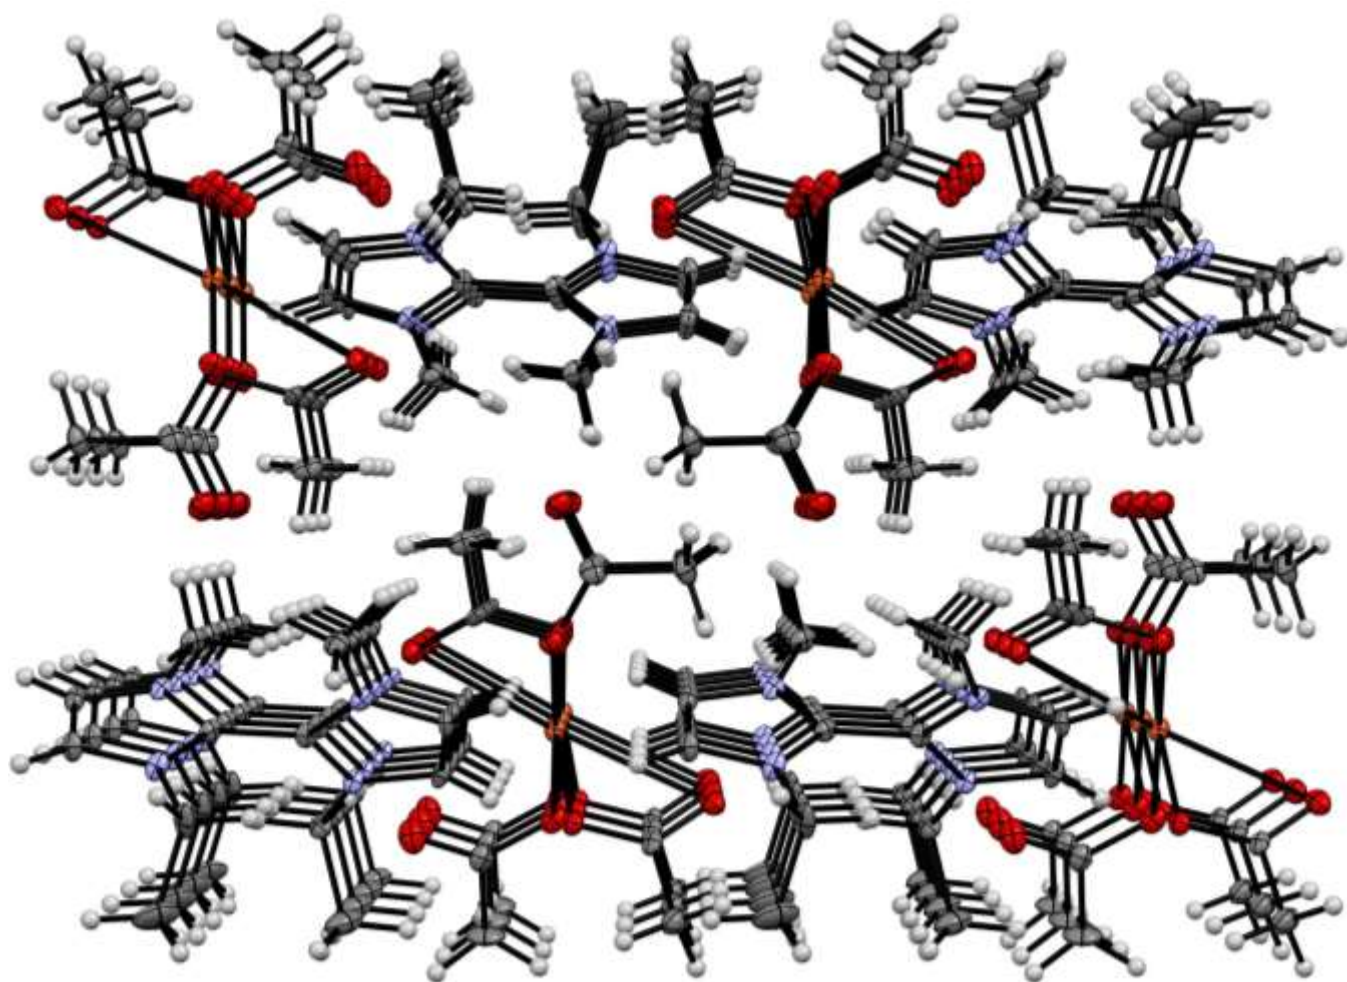

**Figure 3S** The three-dimensional network of **1** crystal viewed down the *a*-axis direction.

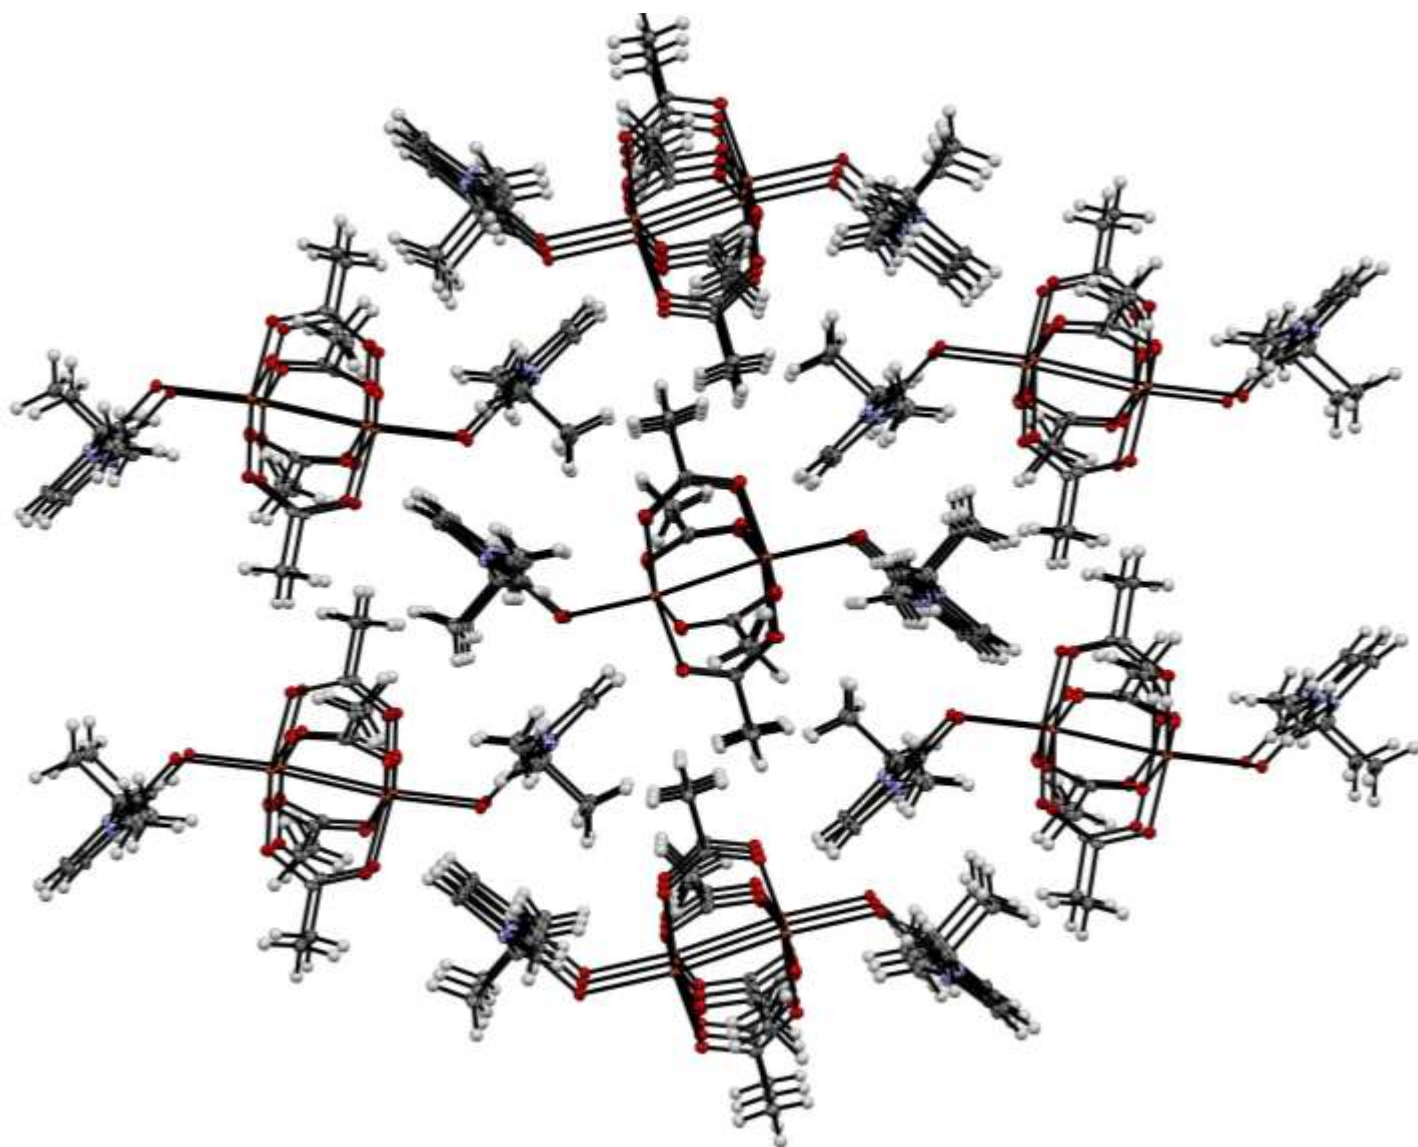

**Figure 4S** The three-dimensional network of **2** crystal viewed down the *a*-axis direction.

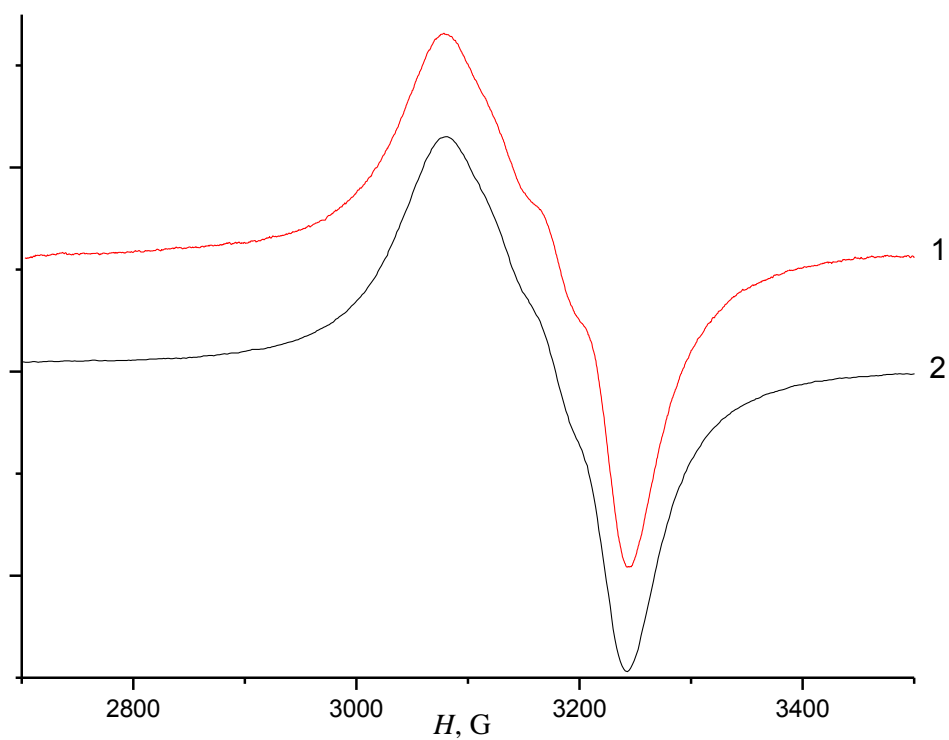

**Fig. 5S** The experimental EPR spectra (X-band, 20 °C) of aqueous solutions of the crystals **1** (0.06 mole dm<sup>-3</sup>) and Cu(AcO)<sub>2</sub>·H<sub>2</sub>O (0.067 mole dm<sup>-3</sup>) denoted as 1 and 2 respectively.
